# Supplementary material for: A data-driven medication score predicts 10-year mortality among aging adults
Source: PubMed Central journal article supplement (PMC7519677; doi:10.1038/s41598-020-72045-z), 2020-09-25

# Supplementary Information

## A data-driven medication score predicts 10-year mortality among aging adults

Paavo Häppölä, MSc,<sup>1</sup> Aki S. Havulinna, PhD,<sup>1,2</sup> Tõnis Tasa, PhD,<sup>3</sup> Nina Mars, MD, PhD,<sup>1</sup> Markus Perola, MD, PhD,<sup>2</sup> Mikko Kallela, MD, PhD,<sup>4</sup> Lili Milani, PhD,<sup>5</sup> Seppo Koskinen, MD, PhD,<sup>2</sup> Veikko Salomaa, MD, PhD,<sup>2</sup> Benjamin M. Neale, PhD,<sup>6,10,11</sup> Aarno Palotie, MD, PhD,<sup>1,6,7,8,9,10,11</sup> Mark Daly, PhD,<sup>1,6,10,11</sup> Samuli Ripatti, PhD<sup>1,11,12\*</sup>

<sup>1</sup> Institute for Molecular Medicine Finland FIMM, HiLIFE, University of Helsinki, Helsinki, Finland.

<sup>2</sup> Finnish Institute for Health and Welfare, Helsinki, Finland.

<sup>3</sup> Institute of Computer Science, University of Tartu, Tartu, Estonia.

<sup>4</sup> Department of Neurology, Helsinki University Central Hospital, Helsinki, Finland.

<sup>5</sup> Estonian Genome Center and Institute of Genomics, University of Tartu, Tartu, Estonia.

<sup>6</sup> Analytic and Translational Genetics Unit, Massachusetts General Hospital, Boston, MA, USA.

<sup>7</sup> Department of Medicine, Massachusetts General Hospital, Boston, MA, USA.

<sup>8</sup> Department of Neurology, Massachusetts General Hospital, Boston, MA, USA.

<sup>9</sup> Department of Psychiatry, Massachusetts General Hospital, Boston, MA, USA.

<sup>10</sup> The Stanley Center for Psychiatric Research, The Broad Institute of MIT and Harvard, Cambridge, MA, USA.

<sup>11</sup> Program in Medical and Population Genetics, The Broad Institute of MIT and Harvard, Cambridge, MA, USA.

<sup>12</sup> Department of Public Health, Clinicum, Faculty of Medicine, University of Helsinki, Helsinki, Finland.

\* Corresponding author.

**Supplementary Table S1. Medication score comparison in the FINRISK validation subset (\* = some models did not converge or coefficient estimate was zero)**

| Method                                    | Indicator                      | No. of ATC codes | R2           | C-index      |
|-------------------------------------------|--------------------------------|------------------|--------------|--------------|
| <b>Number of medications</b>              | <b>Purchased ever (yes/no)</b> | <b>301</b>       | <b>0.148</b> | <b>0.777</b> |
| Number of medications                     | Used over one year (yes/no)    | 301              | 0.147        | 0.776        |
| Number of medications                     | Years of usage (continuous)    | 301              | 0.146        | 0.776        |
| <b>Expert panel</b>                       | <b>Purchased ever (yes/no)</b> | <b>166</b>       | <b>0.149</b> | <b>0.779</b> |
| Expert panel                              | Used over one year (yes/no)    | 166              | 0.148        | 0.778        |
| Expert panel                              | Years of usage (continuous)    | 166              | 0.147        | 0.776        |
| <b>Shotgun stochastic search</b>          | <b>Purchased ever (yes/no)</b> | <b>8</b>         | <b>0.158</b> | <b>0.785</b> |
| <b>SCAD</b>                               | <b>Purchased ever (yes/no)</b> | <b>64</b>        | <b>0.160</b> | <b>0.789</b> |
| SCAD                                      | Used over one year (yes/no)    | 58               | 0.158        | 0.785        |
| SCAD                                      | Years of usage (continuous)    | 55               | 0.156        | 0.784        |
| <b>Univariate coefficients</b>            | <b>Purchased ever (yes/no)</b> | <b>301</b>       | <b>0.164</b> | <b>0.790</b> |
| Univariate coefficients                   | Used over one year (yes/no)    | 286*             | 0.160        | 0.788        |
| Univariate coefficients                   | Years of usage (continuous)    | 301              | 0.157        | 0.785        |
| <b>Cox LASSO (coefficient signs only)</b> | <b>Purchased ever (yes/no)</b> | <b>65</b>        | <b>0.162</b> | <b>0.791</b> |
| Cox LASSO (coefficient signs only)        | Used over one year (yes/no)    | 46               | 0.158        | 0.788        |
| Cox LASSO (coefficient signs only)        | Years of usage (continuous)    | 47               | 0.152        | 0.782        |
| <b>Cox LASSO</b>                          | <b>Purchased ever (yes/no)</b> | <b>65</b>        | <b>0.164</b> | <b>0.791</b> |
| Cox LASSO                                 | Used over one year (yes/no)    | 46               | 0.159        | 0.788        |
| Cox LASSO                                 | Years of usage (continuous)    | 47               | 0.156        | 0.785        |
| <b>Ridge regression</b>                   | <b>Purchased ever (yes/no)</b> | <b>301</b>       | <b>0.164</b> | <b>0.793</b> |
| Ridge regression                          | Used over one year (yes/no)    | 286*             | 0.159        | 0.788        |
| Ridge regression                          | Years of usage (continuous)    | 301              | 0.158        | 0.787        |
| <b>Binomial LASSO</b>                     | <b>Purchased ever (yes/no)</b> | <b>126</b>       | <b>0.165</b> | <b>0.793</b> |
| Binomial LASSO                            | Used over one year (yes/no)    | 65               | 0.162        | 0.789        |
| Binomial LASSO                            | Years of usage (continuous)    | 59               | 0.157        | 0.786        |
| <b>Elastic Net</b>                        | <b>Purchased ever (yes/no)</b> | <b>214</b>       | <b>0.166</b> | <b>0.794</b> |
| Elastic Net                               | Used over one year (yes/no)    | 156              | 0.162        | 0.791        |
| Elastic Net                               | Years of usage (continuous)    | 82               | 0.158        | 0.787        |
| <b>Chronic Disease Score (CDS)</b>        | <b>Purchased ever (yes/no)</b> | <b>56</b>        | <b>0.147</b> | <b>0.779</b> |

**Supplementary Table S2. Lookup table for calculating the medication score. Higher sum indicates increased mortality risk (HR=1.18; 95% CI: 1.14-1.22). (\* also picked by shotgun stochastic search)**

| Associated with increased risk (+1)                                 | Associated with decreased risk (-1)   |
|---------------------------------------------------------------------|---------------------------------------|
| Acetylsalicylic acid (A01AD05)                                      | Amitriptyline (N06AA09)               |
| Alendronic acid (M05BA04)                                           | Atorvastatin (C10AA05)                |
| Amlodipine (C08CA01)                                                | Betahistine (N07CA01)                 |
| Atenolol (C07AB03)                                                  | Estradiol (G03CA03) *                 |
| Bisoprolol (C07AB07)                                                | Estriol (G03CA04)                     |
| Calcitonin (salmon synthetic) (H05BA01)                             | Fluocortolone (C05AA08)               |
| Carvedilol (C07AG02)                                                | Guar gum (A10BX01)                    |
| Citalopram (N06AB04) *                                              | Lorazepam (N05BA06)                   |
| Dextropropoxyphene (N02AC04)                                        | Mesterolone (G03BB01)                 |
| Diazepam (N05BA01)                                                  | Midazolam (N05CD08)                   |
| Digoxin (C01AA05)                                                   | Mirtazapine (N06AX11)                 |
| Dipyridamole (B01AC07)                                              | Nedocromil (R01AC07)                  |
| Donepezil (N06DA02)                                                 | Norethisterone and estrogen (G03FA01) |
| Enalapril (C09AA02)                                                 | Rosuvastatin (C10AA07)                |
| Fenoterol and ipratropium bromide (R03AL01)                         | Simvastatin (C10AA01)                 |
| Fluticasone (D07AC17)                                               | Terbutaline (R03AC03)                 |
| Furosemide (C03CA01) *                                              | Tibolone (G03CX01)                    |
| Furosemide and potassium-sparing agents (C03EB01)                   | Amitriptyline (N06AA09)               |
| Glibenclamide (A10BB01)                                             |                                       |
| Glimepiride (A10BB12)                                               |                                       |
| Haloperidol (N05AD01)                                               |                                       |
| Hydrochlorothiazide and potassium-sparing agents (C03EA01)          |                                       |
| Insulin (human) (A10AB01) *                                         |                                       |
| Ipratropium bromide (R01AX03)                                       |                                       |
| Leuprorelin (L02AE02)                                               |                                       |
| Levodopa and decarboxylase inhibitor (N04BA02)                      |                                       |
| Levomepromazine (N05AA02)                                           |                                       |
| Lisinopril (C09AA03)                                                |                                       |
| Memantine (N06DX01)                                                 |                                       |
| Metformin (A10BA02)                                                 |                                       |
| Metoprolol (C07AB02)                                                |                                       |
| Mianserin (N06AX03)                                                 |                                       |
| Nifedipine (C08CA05)                                                |                                       |
| Oxazepam (N05BA04)                                                  |                                       |
| Perphenazine (N05AB03)                                              |                                       |
| Platelet aggregation inhibitor combinations excl. heparin (B01AC30) |                                       |
| Potassium chloride (A12BA01)                                        |                                       |
| Risperidone (N05AX08) *                                             |                                       |
| Rivastigmine (N06DA03)                                              |                                       |
| Salbutamol (R03AC02)                                                |                                       |
| Tamoxifen (L02BA01)                                                 |                                       |
| Temazepam (N05CD07)                                                 |                                       |
| Theophylline (R03DA04)                                              |                                       |
| Thioridazine (N05AC02)                                              |                                       |
| Tiotropium bromide (R03BB04) *                                      |                                       |
| Tramadol (N02AX02)                                                  |                                       |
| Warfarin (B01AA03) *                                                |                                       |
| Zopiclone (N05CF01) *                                               |                                       |

**Supplementary Table S3. Comorbidity index performance in the FINRISK validation subset and Estonian Biobank (C-index).**

| Comorbidity index                                   | FINRISK validation subset | Estonian Genome Center cohort |
|-----------------------------------------------------|---------------------------|-------------------------------|
| Baseline (age + sex)                                | 0.767                     | 0.775                         |
| Quan Elixhauser-van Walraven Comorbidity Index (EI) | 0.787                     | 0.786                         |
| Quan Deyo-Charlson Comorbidity Index (CI)           | 0.798                     | 0.790                         |

**Supplementary Table S4. Intersection of top-level medication ATC categories covered in studied cohorts.**

| ATC | FINRISK | H2000 | ESTONIAN BIOBANK | DESCRIPTION                                                  |
|-----|---------|-------|------------------|--------------------------------------------------------------|
| A08 | X       |       | X                | Antiobesity preparations, excl. diet products                |
| A10 | X       | X     | X                | Drugs used in diabetes                                       |
| A11 | X       |       | X                | Vitamins                                                     |
| A12 | X       |       | X                | Mineral supplements                                          |
| B01 | X       |       | X                | Antithrombotic agents                                        |
| B04 | X       |       | X                | Serum lipid-reducing agents                                  |
| C01 | X       | X     | X                | Cardiac therapy drugs                                        |
| C02 | X       | X     | X                | Antihypertensives                                            |
| C03 | X       | X     | X                | Diuretics                                                    |
| C04 | X       | X     | X                | Peripheral vasodilators                                      |
| C05 | X       | X     | X                | Vasoprotectives                                              |
| C07 | X       | X     | X                | Beta-adrenergic blocking agents                              |
| C08 | X       | X     | X                | Calcium channel blockers                                     |
| C09 | X       | X     | X                | Agents acting on the renin-angiotensin system                |
| C10 | X       | X     | X                | Lipid modifying agents                                       |
| G02 | X       |       | X                | Other gynecologicals in atc                                  |
| G03 | X       |       | X                | Sex hormones and modulators of the genital system            |
| H02 |         | X     | X                | Corticosteroids for systemic use                             |
| H03 |         | X     | X                | Thyroid therapy drugs                                        |
| H05 | X       |       | X                | Calcium homeostasis                                          |
| L02 | X       |       | X                | Endocrine therapy antineoplastic and immunomodulating agents |
| M05 | X       |       | X                | Drugs for treatment of bone diseases                         |
| N02 | X       |       | X                | Analgesics                                                   |
| N03 |         | X     | X                | Antiepileptics                                               |
| N04 | X       |       | X                | Anti-parkinson drugs                                         |
| N05 | X       | X     | X                | Psycholeptics                                                |
| N06 | X       | X     | X                | Psychoanaleptics                                             |
| N07 | X       |       | X                | Other nervous system drugs                                   |
| R03 | X       |       | X                | Drugs for obstructive airway diseases                        |

**Supplementary Figure S1. Distribution of LASSO signs medication score in the whole aging subset of the FINRISK cohort. Individual scores range from -6 to 18.**

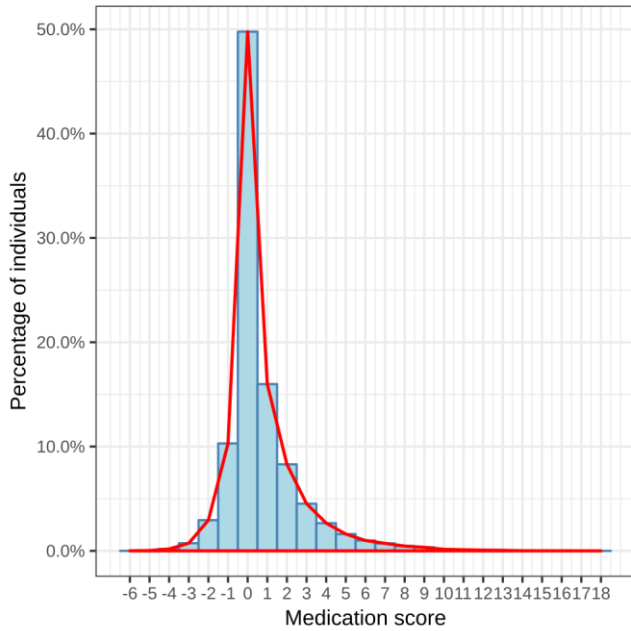

**Supplementary Figure S2. Performance of using different ATC hierarchy levels.**

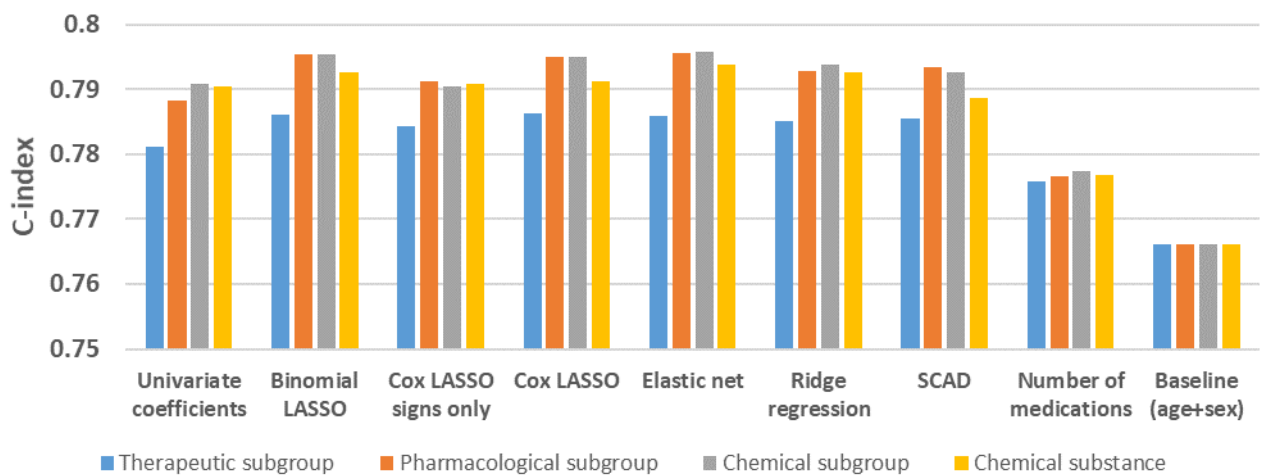

Supplementary Figure S3. Medication score and Charlson comorbidity index in the whole aging population of the FINRISK study. Spearman  $\rho=0.233$ ;  $p<2.2e-16$ . Both are integer scales, points jittered for illustrative purposes.

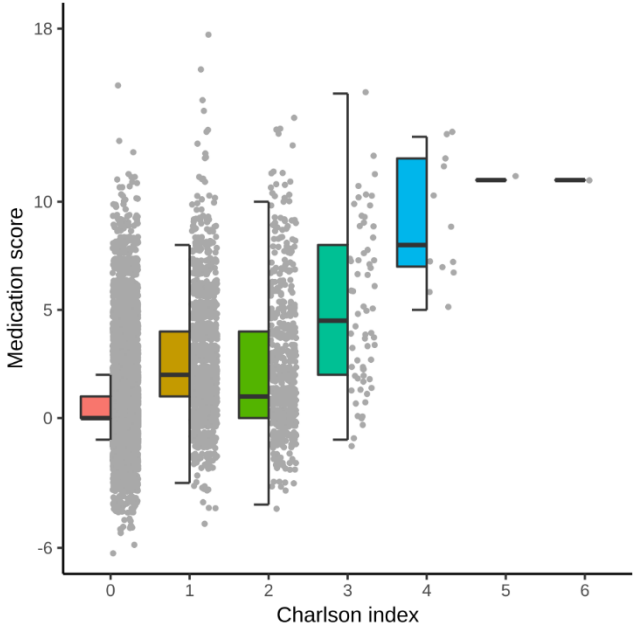

Supplement: 41598_2020_72045_MOESM1_ESM.pdf [file 41598_2020_72045_MOESM1_ESM.pdf]
